# Supplementary material for: DLP 3D printing of electrically conductive hybrid hydrogels via polymerization-induced phase separation and subsequent in situ assembly of polypyrrole
Source: Royal Society of Chemistry journal article supplement (doi:10.1039/d3ta06779c), 2024-01-01
Supplement: d3ta06779c1.pdf [file d3ta06779c1.pdf]

## Supporting Information

### **DLP 3D printing of electronically conductive hybrid hydrogels via polymerization-induced phase separation and subsequent in-situ assembly of polypyrrole**

*Chuhan Song<sup>1,2</sup>, Qian Zhao<sup>2</sup>, Tao Xie<sup>2</sup>, Jingjun Wu<sup>1,2\*</sup>*

1Ningbo Innovation Center, Zhejiang University, Ningbo 315807, China

2State Key Laboratory of Chemical Engineering, College of Chemical and Biological Engineering, Zhejiang University, Hangzhou 310027, China

\*Correspondence: [jingjunwu@zju.edu.cn](mailto:jingjunwu@zju.edu.cn)

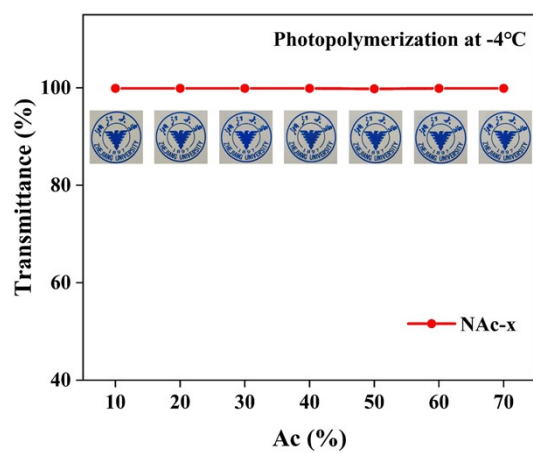

**Figure S1.** Transmittance of hydrogels with different Ac ratios for photoinitiated polymerization at -4 °C.

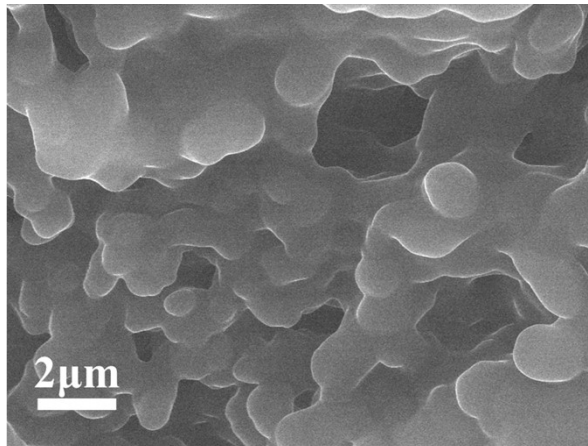

**NAc-50**

**Figure S2.** FESEM image of NAc-50. The electron microscope image is based on the cross section of the hydrogel sample.

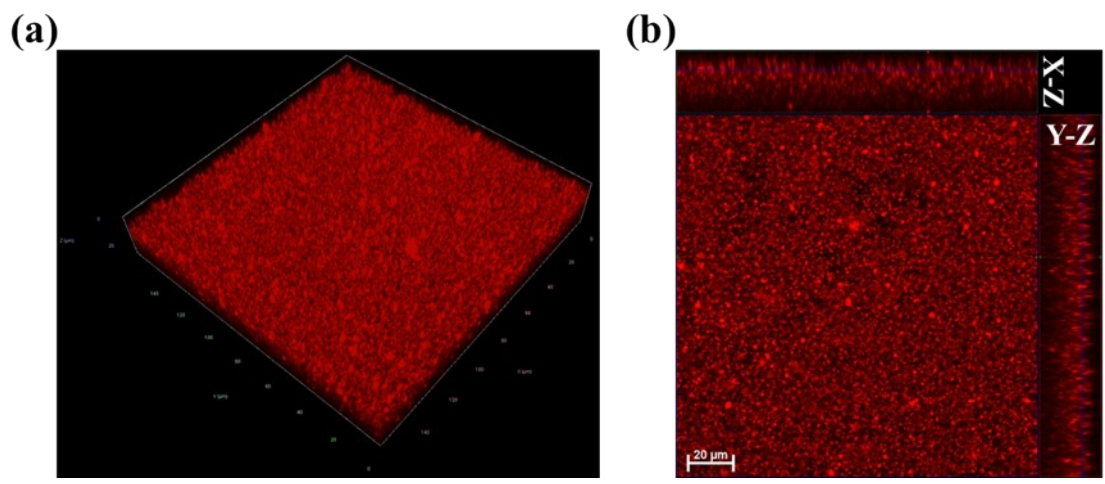

**Figure S3.** (a) Laser confocal microscope 3D contour image of NAc-50 porous hydrogel. (b) Top view, X-Z profile and Y-Z profile of NAc-50 porous hydrogel by laser confocal microscopy.

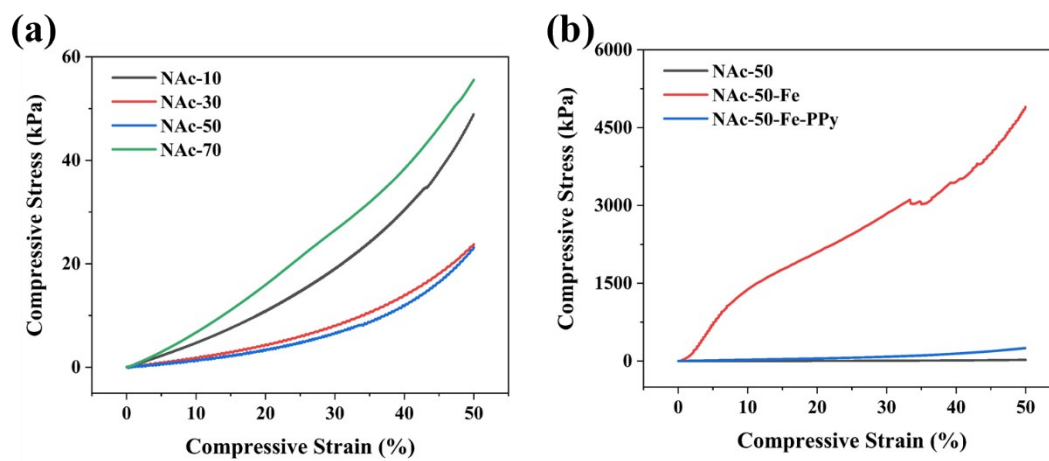

**Figure S4.** (a) Mechanical test of hydrogels of NIPAm and Ac with different compositions. (b) Mechanical test of hydrogels of NAc-50, NAc-50-Fe and NAc-50-Fe-PPy sample.

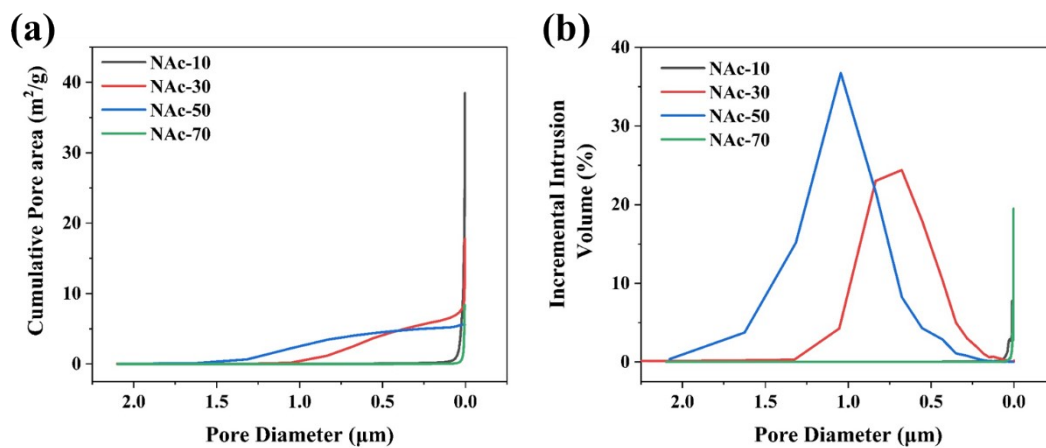

**Figure S5.** (a) Cumulative pore area of dried hydrogels with different compositions. (b) Pore size distribution of dried hydrogels with different compositions.

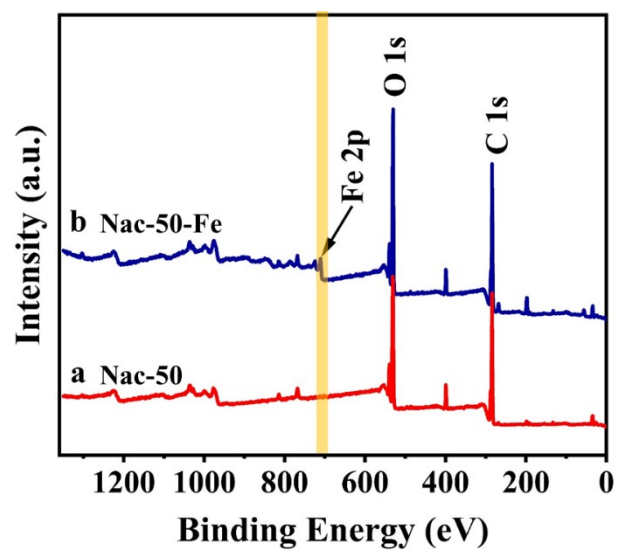

**Figure S6.** XPS spectra of NAc-50 and NAc-50-Fe porous hydrogels.

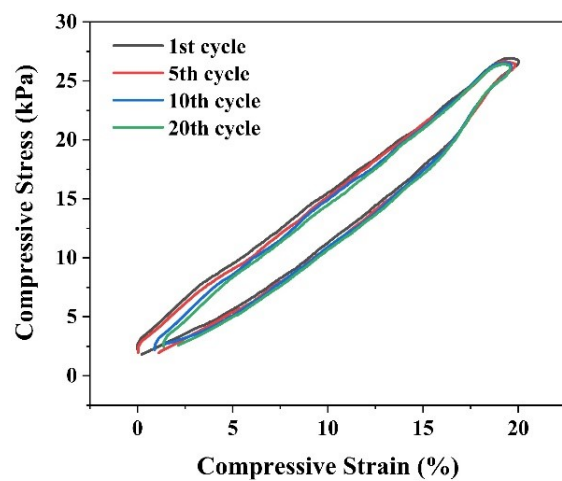

**Figure S7.** Cyclic mechanical test of NAc-50-Fe-PPy hydrogel.



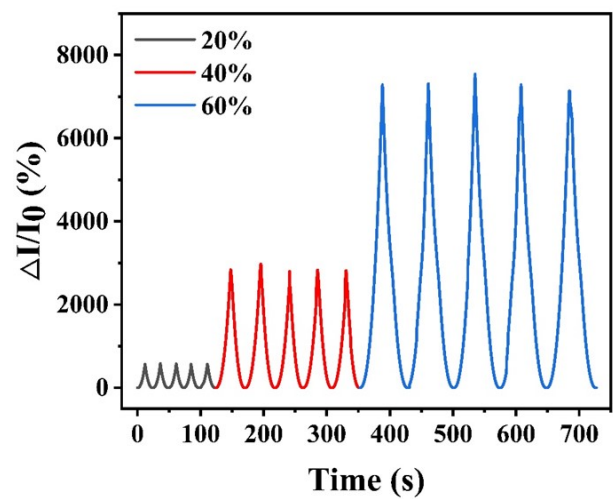

**Figure S8.** Piezoresistive properties of NAc-50-Fe-PPy piezoresistive sensor with low density lattice at different compression amplitudes.

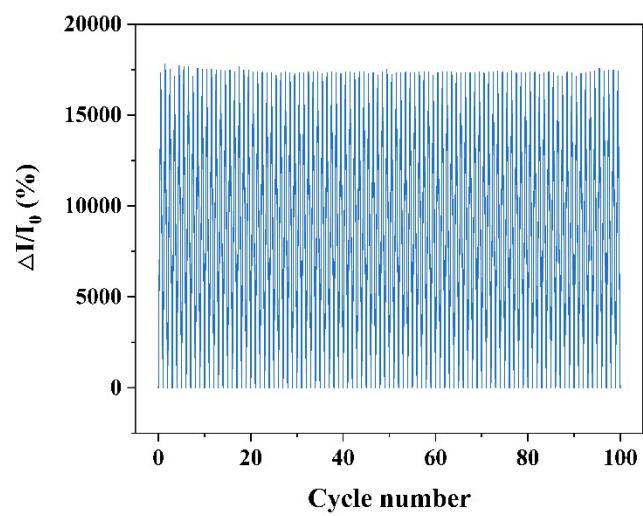

**Figure S9.** Long-term stability of NAc-50-Fe-PPy piezoresistive sensor at 20% strain.
